# Supplementary material
Source: PubMed Central journal article supplement (PMC2585121)
Supplement: supp_179_12_1247__1.pdf [file supp_179_12_1247__1.pdf]

# À la recherche d'un équilibre entre preuves et opinions dans le traitement de l'AVC : Recommandations pour les pratiques optimales 2008

**Mark Bayley MD, Patrice Lindsay BScN PhD, Chelsea Hellings BScH, Elizabeth Woodbury BCom MHA, Stephen Phillips MBBS, au nom de la Stratégie de l'AVC (initiative conjointe du Réseau canadien contre les accidents cérébrovasculaires et de la Fondation des maladies du cœur du Canada).**

La vitesse à laquelle la recherche sur le traitement de l'AVC progresse et génère de nouvelles données est telle qu'elle compromet notre capacité de garder le système de santé à jour. Par exemple, dix ans après la publication d'une méta-analyse démontrant que la prestation de soins dans une unité de traitement spécialisée en AVC réduisait la probabilité de mortalité et d'invalidité dans une proportion allant jusqu'à 30 %<sup>1</sup>, moins du tiers des victimes d'un AVC aigu admises dans des hôpitaux canadiens ont reçu ce type de soins spécialisés<sup>2</sup>. La Stratégie canadienne de l'AVC a préparé une mise à jour de ses Recommandations canadiennes pour les pratiques optimales de soins de l'AVC 2006 qui, nous l'espérons, contribuera à combler cette lacune dans le transfert des connaissances. Dans le présent commentaire, nous souhaitons mettre l'accent sur les preuves récentes relatives au traitement de l'AVC qui ont été intégrées aux recommandations durant le processus de mise à jour, aborder les domaines où il a été plus difficile de trouver un équilibre entre les preuves tirées de la recherche et l'opinion des experts et revoir les obstacles à la mise en œuvre des recommandations, identifiés par le comité de consensus national.

Dans le supplément du présent numéro du *JAMC* (voir [www.cmaj.ca/content/vol179/issue12/#supplement](http://www.cmaj.ca/content/vol179/issue12/#supplement)), nous présentons des recommandations pour les pratiques optimales de soins de l'AVC appliquées à 27 domaines; 23 constituent des mises à jour des recommandations de 2006 et 4 abordent de nouveaux sujets<sup>3-5</sup>. Au cours des 18 derniers mois, des groupes d'experts ont révisé les recommandations diffusées en 2006 et formulé 4 nouvelles recommandations. Le comité de consensus national s'est réuni en avril 2008 pour confirmer les recommandations actualisées. Deux des recommandations de la version 2006 sur les pratiques optimales en matière d'AVC, celles qui concernaient le traitement antiplaquettaire et la thrombolyse aiguë, ont dû faire l'objet d'une autre révision par suite des récentes percées importantes réalisées après la réunion d'avril 2008 du comité de consensus national. Dans les deux cas, les groupes de travail concernés, le comité de consensus et d'autres intervenants clés ont été consultés au cours du processus de révision.

La recommandation pour les pratiques optimales en matière de traitement antiplaquettaire en prévention secondaire de l'AVC a été modifiée par suite des résultats de l'étude ProFESS (Prevention Regimen For Effectively avoiding Second Stroke)<sup>6</sup>. Cette étude n'a fait état d'aucune différence significative quant aux taux de récurrence des AVC selon que

## Points clés

- La version actualisée 2008 des Recommandations canadiennes pour les pratiques optimales de soins de l'AVC inclut quatre nouveaux sujets : les soins préhospitaliers; l'évaluation et le traitement de l'accident ischémique transitoire et de l'AVC mineur; la réduction des complications en cours d'hospitalisation; le traitement de l'atteinte cognitive d'origine vasculaire dans l'AVC.
- La période à l'intérieur de laquelle le traitement thrombolytique peut être administré dans les cas d'AVC ischémique passe de 3 heures à 4,5 heures.
- Les recommandations incluent désormais les dimensions de la planification du congé hospitalier et de l'AVC chez enfants.

les patients étaient traités au moyen d'acide acétylsalicylique (AAS) en association avec du dipyridamole à libération prolongée et les sujets traités par clopidogrel (9,0 % c. 8,8 %; risque relatif [RR] 1,01; intervalle de confiance [IC] à 95 % 0,92–1,11). Ce résultat est venu étayer ceux d'études qui ont comparé l'AAS et l'AAS associé au dipyridamole à libération prolongée<sup>7</sup> ou l'AAS associé au clopidogrel<sup>8</sup> et selon lesquelles la supériorité de ces schémas antiplaquetitaires n'était que minime par rapport à l'AAS seul. Par conséquent, la recommandation de 2008 pour les pratiques optimales en matière de traitement antiplaquettaire (recommandation 2.5) rappelle que chez les patients victimes d'un AVC ischémique ou d'un accident ischémique transitoire, un traitement antiplaquettaire s'impose, à moins que l'anticoagulation soit indiquée, et que l'AAS ou l'AAS associé au dipyridamole à libération prolongée ou au clopidogrel peuvent être utilisés, selon le tableau clinique<sup>7,9-11</sup>. Certains détracteurs pourraient déplorer que cette position ne soit pas suffisamment directive, mais la recommandation vise à souligner l'importance du traitement antiplaquettaire prolongé et soutenu, tout en laissant au prescripteur le soin de l'adapter au cas par cas.

Nous avons aussi révisé la recommandation relative au traitement thrombolytique (recommandation 3.5) sur la base

De la Division de physiothérapie (Bayley), Institut de réadaptation de Toronto, Toronto (Ont.); du Département de médecine (Bayley) et du Département des politiques, de la gestion et de l'évaluation de la santé (Lindsay, Hellings), Université de Toronto, Toronto (Ont.); du Réseau canadien contre les accidents cérébrovasculaires (Lindsay), Etobicoke (Ont.); de la Stratégie canadienne de l'AVC (Woodbury), Ottawa (Ont.) et du département de médecine (neurologie) (Phillips), Centre des sciences de la santé Reine Elizabeth II et Université Dalhousie, Halifax (N.-É.).

Les opinions exprimées dans le contenu rédactionnel du *JAMC* sont celles des auteurs et ne sont pas nécessairement celles de l'Association médicale canadienne.

des données provenant de la partie 3 de l'étude ECASS (European Collaborative Acute Stroke Study)<sup>12</sup> et d'une nouvelle revue de la base de données Cochrane<sup>13</sup>. La période durant laquelle l'activateur tissulaire du plasminogène i.v. dans l'AVC ischémique est considéré efficace a été prolongée, passant de trois heures à quatre heures et demie après le déclenchement des symptômes d'AVC. Il est important de rappeler que pour une personne victime d'AVC, « temps = cerveau » et plus le traitement est administré rapidement, meilleure sera l'issue. Par conséquent, même si un patient se présente après la période de trois heures, on devrait envisager la thrombolyse aiguë. Toutefois, dès qu'un patient se présente à l'urgence, il faut procéder au diagnostic et au traitement sans délai.

Nous avons ajouté quatre nouveaux sujets dans la présente mise à jour des lignes directrices canadiennes sur l'AVC. Le premier de ces sujets (recommandation 3.1) concerne le potentiel du traitement thrombolytique, qui a fait de l'AVC une situation d'urgence où chaque minute compte. Les équipes de traitement aigu de l'AVC et les services d'urgence doivent continuer d'accorder la priorité à toutes les présumées victimes d'un AVC afin d'assurer un diagnostic et un traitement rapides. Un système d'intervention coordonnée des services d'urgence s'impose pour faciliter l'accès au traitement thrombolytique. Le transport des victimes d'AVC vers des hôpitaux aptes à les prendre en charge se trouve accéléré lorsque le personnel des urgences est dûment formé et observe les protocoles établis<sup>14</sup>. Nous sommes d'avis qu'il s'agit d'un élément clé de l'organisation des soins de l'AVC. C'est pourquoi nous avons recommandé, sur la base de preuves tirées uniquement d'observations, que «toutes les présumées victimes d'un AVC dont les symptômes se sont déclenchés moins de quatre heures et demie auparavant soient traitées comme des cas d'urgence chez qui chaque minute compte et transportées sans délai vers le plus proche établissement de santé capable de leur prodiguer les soins d'urgence pour l'AVC».

La seconde nouvelle recommandation (recommandation 3.2) concerne la prise en charge des patients qui consultent en médecine de premier recours ou au service d'urgence pour un accident ischémique transitoire ou un AVC mineur présumé. Le risque d'un AVC invalidant, qui se situe à environ 5 % au cours de la première semaine suivant un accident ischémique transitoire, peut substantiellement diminuer grâce à un diagnostic et à un traitement rapides<sup>15</sup>. Une étude de comparaison séquentielle, prospective, basée dans la population, l'étude EXPRESS (Early use of eXisting PREventive Strategies for Stroke) a montré que l'application sans délai des stratégies préventives existantes dans des cliniques spécialisées a réduit de 80 % le risque d'AVC invalidant trois mois après un accident ischémique transitoire ou un AVC mineur<sup>16</sup>. Il ne s'agissait pas d'une étude contrôlée et randomisée, mais sa rigueur méthodologique a été jugée suffisante pour justifier que l'on recommande de diriger immédiatement les victimes d'un accident ischémique transitoire vers un médecin expert de la prise en charge de l'AVC dans un centre de prévention de l'AVC ou, en l'absence de telles options, vers un service d'urgence ayant accès à des équipements d'imagerie neurovasculaire.

Au cours de notre processus de consultation des quelques

dernières années, plusieurs intervenants ont demandé des directives plus claires sur certains aspects des soins hospitaliers aux victimes d'AVC. Si l'impact des soins prodigués par les centres de traitement de l'AVC sur la mortalité et l'invalidité semble passer par la prévention des complications post-AVC et le début précoce d'une réadaptation pluridisciplinaire coordonnée<sup>17</sup>, de nombreux éléments des soins précoces de l'AVC restent encore à étudier plus en détail. La mobilisation hâtive, la prévention de la thromboembolie veineuse, la prise en charge des soins de la bouche, l'administration d'un soutien nutritionnel, l'évaluation de la dysphagie et la prise en charge des dysfonctions urinaires et intestinales sont des thèmes qui ont fait surface lors du processus de consultation et ensemble, ils forment la troisième de ces nouvelles recommandations pour les pratiques optimales (recommandation 4.2). Encore une fois, bien que la solidité des preuves tirées de la recherche ait varié d'un sujet à l'autre, ces questions ont été incluses en raison de leur impact potentiel sur le rétablissement des patients et la durée de leur hospitalisation.

Selon la recherche émergente, pour chaque AVC cliniquement manifeste, on dénombre de six à neuf AVC «silencieux» qui prennent la forme d'une atteinte cognitive<sup>18</sup>. L'atteinte cognitive d'origine vasculaire affecte jusqu'à 60 % des survivants d'un AVC et est associée à un ralentissement fonctionnel sur le plan des activités de la vie quotidienne<sup>19</sup>. La quatrième nouvelle recommandation (recommandation 6.3) concerne donc l'évaluation et la prise en charge de l'atteinte cognitive d'origine vasculaire. Pour le comité de consensus, le défi consistait à faire le point sur l'ampleur du problème que représentent d'une part l'atteinte cognitive d'origine vasculaire et de l'autre, la relative rareté des preuves permettant d'orienter le traitement. La recommandation qui en résulte vise à attirer l'attention sur l'atteinte cognitive d'origine vasculaire, l'importance d'une correction énergique des facteurs de risque d'AVC et la nécessité d'approfondir la recherche dans ce domaine.

#### **Encadré 1 : Priorités du comité de consensus pour l'application des Recommandations canadiennes pour les pratiques optimales de soins de l'AVC**

- Prise en charge de l'accident ischémique transitoire et de l'AVC mineur\*
- Réadaptation en milieu ambulatoire et communautaire\*
- Mise sur pied de centres de traitement de l'AVC\*
- Prise en charge de l'AVC par les services médicaux d'urgence
- Évaluations initiales en vue de la réadaptation
- Prise en charge de la tension artérielle\*
- Prestation de services de réadaptation en milieu hospitalier\*
- Prise en charge de la dépression post-AVC\*
- Interventions carotidiennes\*
- Anticoagulation chez les victimes d'AVC présentant de la fibrillation auriculaire\*

\*Appuyées par les degrés de preuves les plus solides

## Application

Le comité de consensus de 2008 s'était entre autre donné pour tâche de reconnaître les obstacles à l'application des Recommandations canadiennes pour les pratiques optimales de soins de l'AVC, leurs solutions et leur ordre de priorité. Les deux plus importants obstacles relevés par le comité étaient (1) les priorités divergentes des systèmes de soins de santé, des régions et des établissements et (2) le manque de ressources humaines, budgétaires et matérielles. Le comité de consensus a été invité à classer les recommandations par ordre de priorité en vue de leur application. Fait intéressant à noter, invité à dresser «la liste des dix recommandations qui, si elles étaient appliquées immédiatement, exerceraient le plus d'impact sur les soins de l'AVC au Canada», le comité a choisi huit recommandations étayées par les degrés de preuve les plus solides et deux domaines clés pour lesquels les preuves solides manquent encore quoiqu'ils soient considérés comme d'importants moteurs de changement pour le système de santé (Encadré 1). Le rétablissement post-AVC occupe une place de choix parmi ces dix domaines prioritaires puisqu'il a été démontré que la réadaptation à l'hôpital et en milieu communautaire améliore le pronostic.

## Étapes suivantes

Les Recommandations canadiennes pour les pratiques optimales de soins de l'AVC visent à fournir une orientation claire pour la prestation des soins cliniques et l'amélioration du système de santé. Le nombre limité d'études de grande qualité dans certains domaines a fait ressortir l'écart entre les preuves fournies par la recherche et les opinions des experts durant le processus de rédaction des directives. Néanmoins, parmi les 47 énoncés de recommandation, 25 s'appuient sur des études randomisées et contrôlées, 15, sur des études non randomisées et contrôlées et 7, sur un consensus des experts. Ainsi, notre synthèse des preuves a permis de relever un certain nombre de domaines clés où une recherche plus approfondie s'impose. Selon nous, les priorités immédiates en matière de soins de l'AVC sont : l'application à grande échelle des recommandations pour les pratiques optimales présentées dans la mise à jour de 2008 et une évaluation systématique de leur impact sur les protocoles de soin, sur l'évolution des patients et le fonctionnement du système de santé. L'application de protocoles de soins intégrés et la mesure des paramètres cliniques jugés importants dans tout le système de santé permettront d'offrir une orientation claire pour favoriser l'amélioration continue de la qualité et de l'universalité des soins de l'AVC sur l'ensemble du territoire canadien.

**Collaborateurs :** Tous les auteurs ont contribué au contenu de l'article, en ont fait une révision critique et en ont approuvé la version finale soumise pour publication.

**Intérêts concurrents :** Aucuns déclarés.

Traduit par le Service de traduction de l'AMC

## RÉFÉRENCES

- Langhorne P, Williams BO, Gilchrist W et coll. Do stroke units save lives? *Lancet* 1993;342:395-8.
- Kapral MK, Laupacis A, Phillips SJ et coll. Investigators of the Registry of the Canadian Stroke Network. Stroke care delivery in institutions participating in the Registry of the Canadian Stroke Network. *Stroke* 2004;35:1756-62.
- Le Réseau canadien contre les accidents cérébrovasculaires; la Fondation des maladies du cœur du Canada. *Recommandations canadiennes pour les pratiques optimales de soins de l'AVC 2006*. Ottawa (Ont.) : la Stratégie canadienne de l'AVC; 2006. Disponible à l'adresse : [www.canadianstrokestrategy.ca/eng/resources-tools/documents/StrokeStrategyManual.pdf](http://www.canadianstrokestrategy.ca/eng/resources-tools/documents/StrokeStrategyManual.pdf) (consulté le 28 octobre 2008).
- Lindsay P, Bayley M, McDonald A et coll. Toward a more effective approach to stroke: Canadian Best Practice Recommendations for Stroke Care. *CMAJ* 2008; 178:1418-25.
- Lindsay P, Bayley M, Hellings C et coll. Recommandations canadiennes pour les pratiques optimales de soins de l'AVC (mise à jour de 2008). *CMAJ* Disponible à l'adresse : [www.cmaj.ca/content/vol179/issue12/#supplement](http://www.cmaj.ca/content/vol179/issue12/#supplement).
- Sacco R, Diener HC, Yusuf S et coll. Groupe de l'étude PROFESS. Aspirin and extended-release dipyridamole versus clopidogrel for recurrent stroke. *N Engl J Med* 2008;359:1238-51.
- Verro P, Gorelick PB, Nguyen D. Aspirin plus dipyridamole versus aspirin for prevention of vascular events after stroke or TIA: a meta-analysis. *Stroke* 2008; 39:1358-63.
- Hankey GJ, Sudlow CL, Dunbabin DW. Thienopyridine derivatives (ticlopidine, clopidogrel) versus aspirin for preventing stroke and other serious vascular events in high vascular risk patients. *Cochrane Database of Syst Rev* 2000;(2):CD001246.
- CAPRIE Steering Committee. A randomised, blinded, trial of clopidogrel versus aspirin in patients at risk of ischaemic events (CAPRIE). *Lancet* 1996;348:1329-39.
- Halkes PH, van Gijn A, Kappelle LJ et coll. Groupe de l'étude ESPRIT. Aspirin plus dipyridamole versus aspirin alone after cerebral ischaemia of arterial origin (ESPRIT): randomised controlled trial. [Erratum publié dans *Lancet* 2007;369:274]. *Lancet* 2006;367:1665-73.
- De Schryver EL, Algra A, van Gijn J. Dipyridamole for preventing stroke and other vascular events in patients with vascular disease. Mise à jour. Dans : *The Cochrane Library*, No 3. Oxford (R.-U.) : Update Software, MetaView; 2007.
- Hacke W, Kaste M, Bluhmki E, et coll. ECASS Investigators. Thrombolysis with alteplase 3 to 4.5 hours after acute ischemic stroke. *N Engl J Med* 2008;359:1317-29.
- Mielke O, Wardlaw J, Liu M. Thrombolysis (different doses, routes of administration and agents) for acute ischaemic stroke. *Cochrane Database Syst Rev* 2004;(2): CD000514.
- Riopelle RJ, Howse DC, Bolton C, et coll. Regional access to acute ischemic stroke intervention. *Stroke* 2001;32:652-5.
- Giles MF, Rothwell PM. Risk of stroke early after transient ischaemic attack: a systematic review and meta-analysis. *Lancet Neurol* 2007;6:1063-72.
- Hackam DG, Spence JD. Combining multiple approaches for the secondary prevention of vascular events after stroke: a quantitative modeling study. *Stroke* 2007;38:1881-5.
- Langhorne P, Pollock A; Stroke Unit Trialists' Collaboration. What are the components of effective stroke unit care? *Age Ageing* 2002;31:365-71.
- Teasell RW, Foley NC, Salter K, et coll. *EBSRS: evidence-based review of stroke rehabilitation*. 10e éd. London (Ont.) : EBSRS; 2007. Disponible à l'adresse : [www.EBSRS.com/](http://www.EBSRS.com/) (consulté le 28 octobre 2008).
- Black SE. Therapeutic issues in vascular dementia: studies, designs and approaches. *Can J Neurol Sci* 2007;34 Suppl 1:S125-30.

**Correspondance :** Dr Mark Bayley, Toronto Rehabilitation Institute, Division of Psychiatry, 550 University Ave., Rm. 1023, Toronto ON M5G 2A2; télécopieur : 416 597-3422 poste 3943; [Bayley.Mark@TorontoRehab.on.ca](mailto:Bayley.Mark@TorontoRehab.on.ca)
